# Supplementary material
Source: PubMed Central journal article supplement (PMC3160100)
Supplement: supp_138.18.4063_DEV069195FigS5.pdf [file supp_138.18.4063_DEV069195FigS5.pdf]

Wild-type

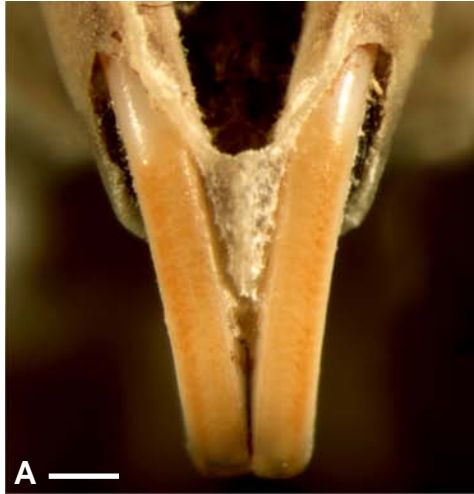

*Spry2*<sup>+/-</sup>;*Spry4*<sup>-/-</sup>

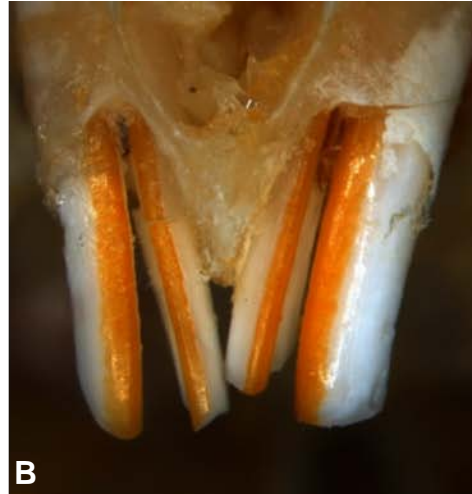

*Spry2*<sup>+/-</sup>;*Spry4*<sup>-/-</sup>;*Fgf10*<sup>+/-</sup>

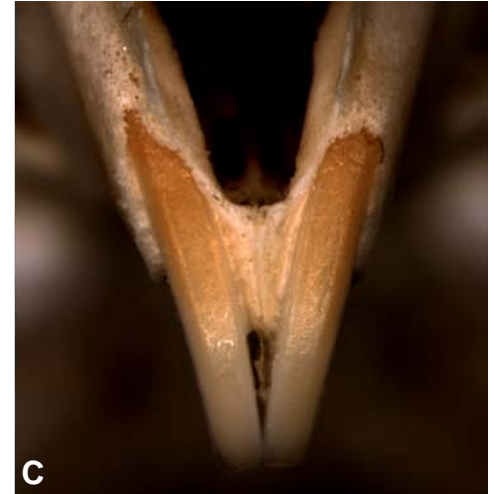

|              | Wild-type    | <i>Spry2</i> <sup>+/-</sup> ; <i>Spry4</i> <sup>-/-</sup> | <i>Spry2</i> <sup>+/-</sup> ; <i>Spry4</i> <sup>-/-</sup> ; <i>Fgf10</i> <sup>+/-</sup> |
|--------------|--------------|-----------------------------------------------------------|-----------------------------------------------------------------------------------------|
| One incisor  | 50/50 (100%) | 17/30 (57%)                                               | 10/12 (83%)                                                                             |
| Two incisors | 0/50 (0%)    | 13/30 (43%)                                               | 2/12 (17%)                                                                              |
