# Supplementary material
Source: PubMed Central journal article supplement (PMC3160100)
Supplement: supp_138.18.4063_DEV069195TableS1.pdf [file supp_138.18.4063_DEV069195TableS1.pdf]

**Table S1. Primer sequences for quantitative RT-PCR**

| Gene         | Primer sequences                                               |
|--------------|----------------------------------------------------------------|
| <i>Spry2</i> | F – GCAGTGCCTCTGCTCAGCCC<br>R – ACCCGCCTGTTCACCTCGGT           |
| <i>Spry4</i> | F – CCCGTGAGTAGCAGGATGGAGAAGG<br>R – CTGGAGGATGGCGTGATGAGCGGAC |
| <i>Shh</i>   | F – TTACGTCCCGGAGACCGCGT<br>R – GTGGGCCCCGAGTCGTTGTG           |
| <i>Etv5</i>  | F – GACCCTGCACAGCCGTTCCC<br>R – CGTCCCCACCGTCCAAACC            |
| <i>Fgf9</i>  | F – ACCTGGCATGAACGAGAAG<br>R – TCTCCTCCGGTGCCACATGTTT          |
| <i>Fgf10</i> | F – CCGAGGACGGAGCGAGGACA<br>R – CGGCAGGTGGGGAAAGGCTG           |
| <i>L19</i>   | F – ATGTATCACAGCCTGTACCTG<br>R – TTCTTGGTCTCTCCTCCTTG          |
