# Supplementary material
Source: PubMed Central journal article supplement (PMC3160100)

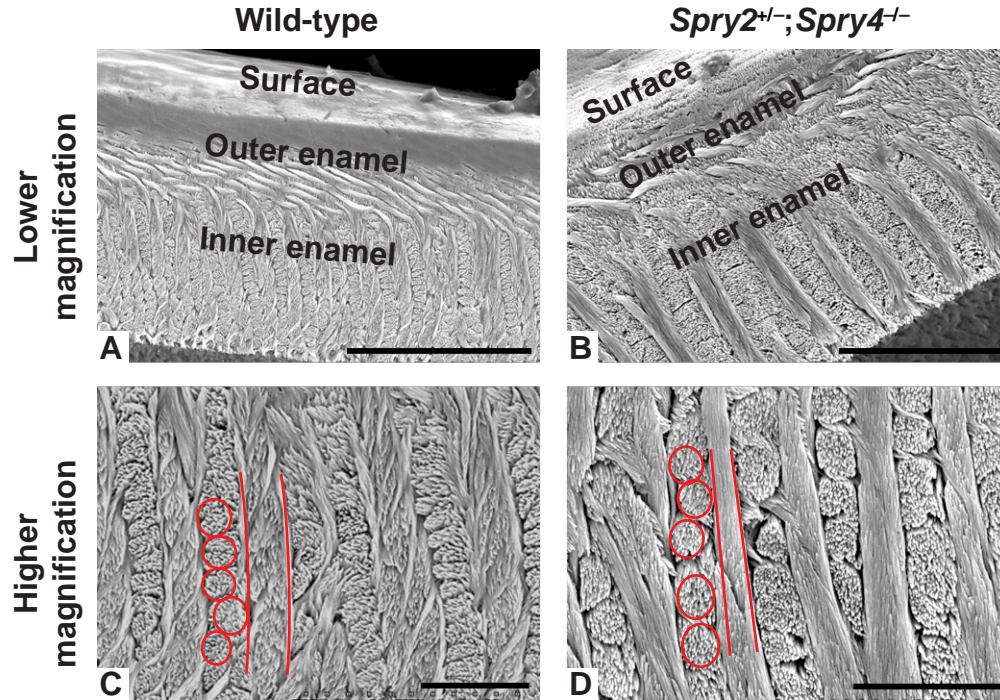

Supplement: supp_138.18.4063_DEV069195FigS1.pdf [file supp_138.18.4063_DEV069195FigS1.pdf]

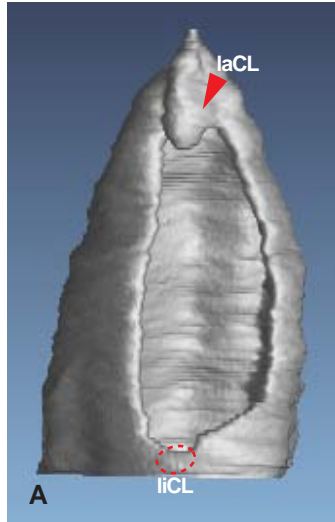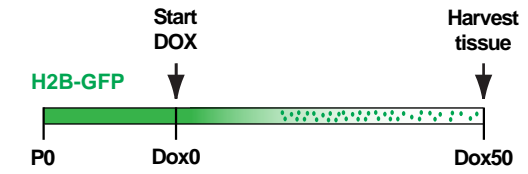

B

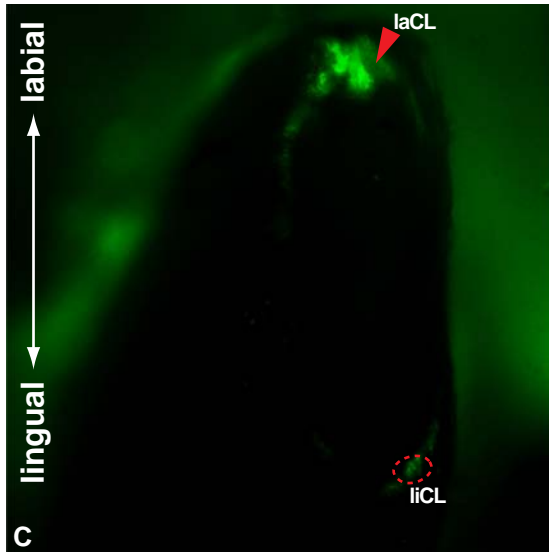

Wild-type

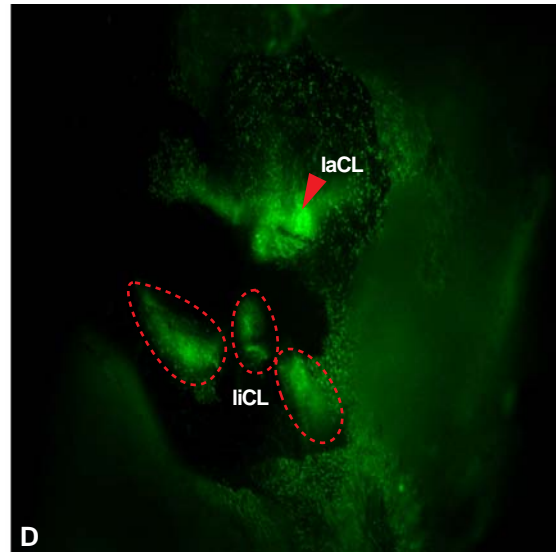

*Spry2*<sup>+/-</sup>; *Spry4*<sup>-/-</sup>

Supplement: supp_138.18.4063_DEV069195FigS2.pdf [file supp_138.18.4063_DEV069195FigS2.pdf]

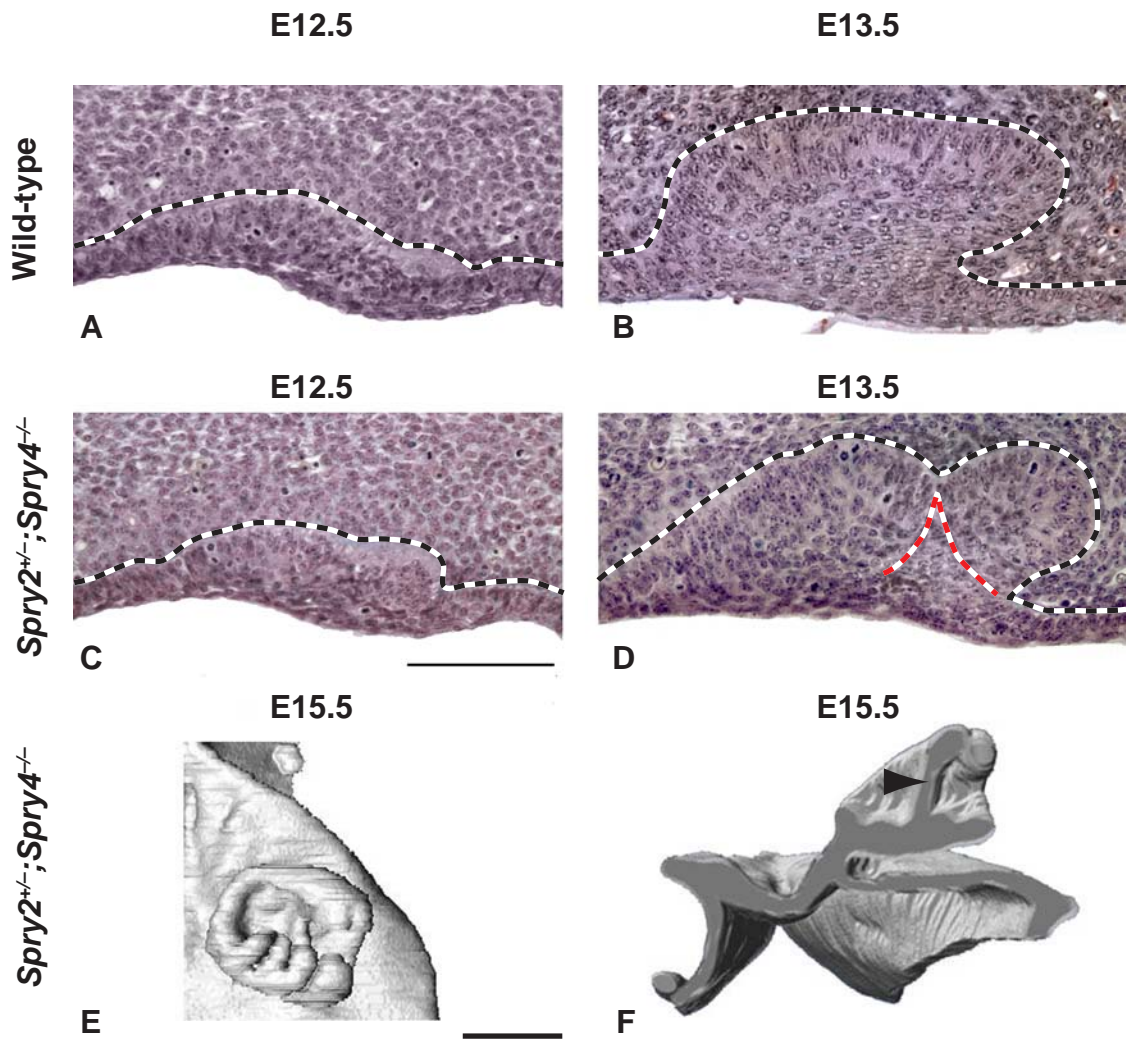

Supplement: supp_138.18.4063_DEV069195FigS3.pdf [file supp_138.18.4063_DEV069195FigS3.pdf]

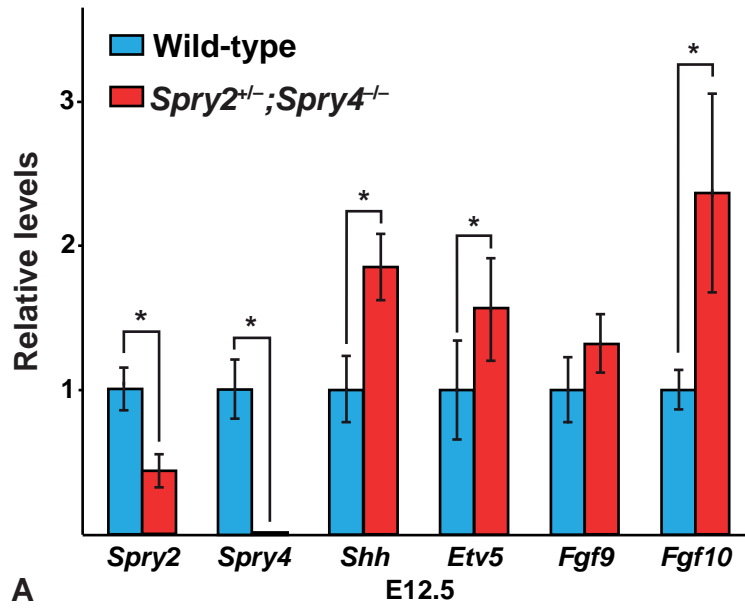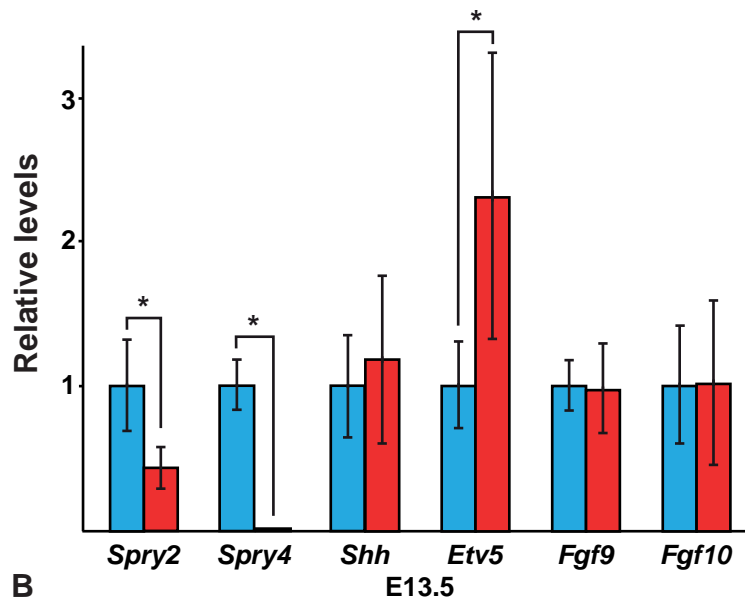

Supplement: supp_138.18.4063_DEV069195FigS4.pdf [file supp_138.18.4063_DEV069195FigS4.pdf]

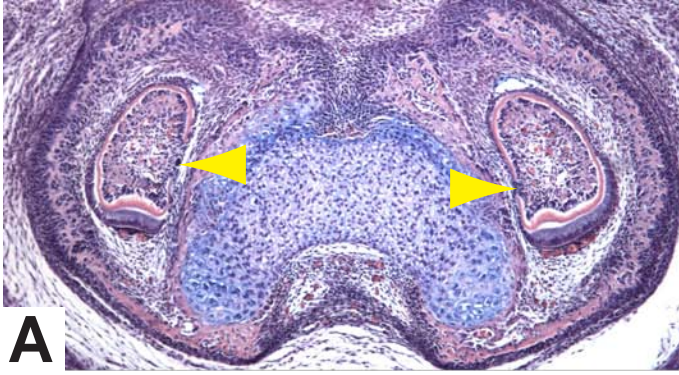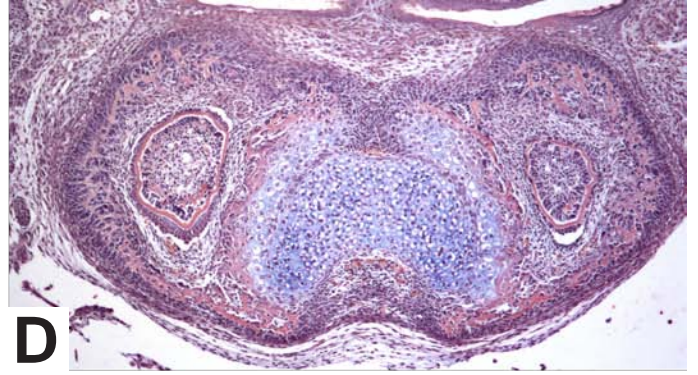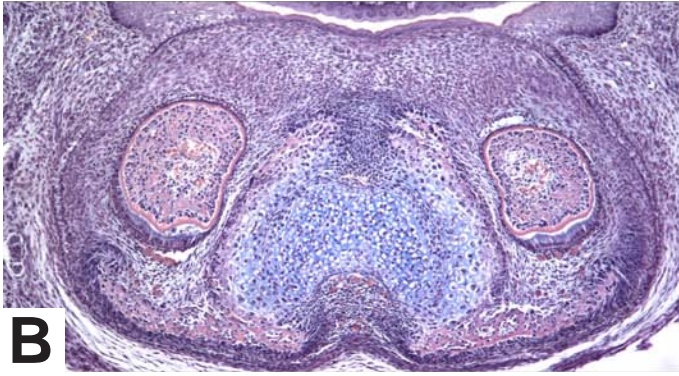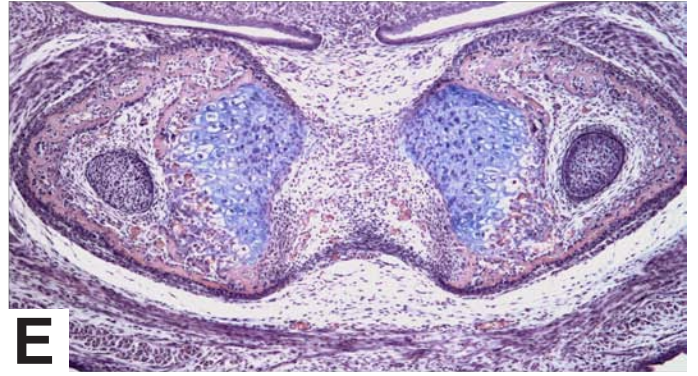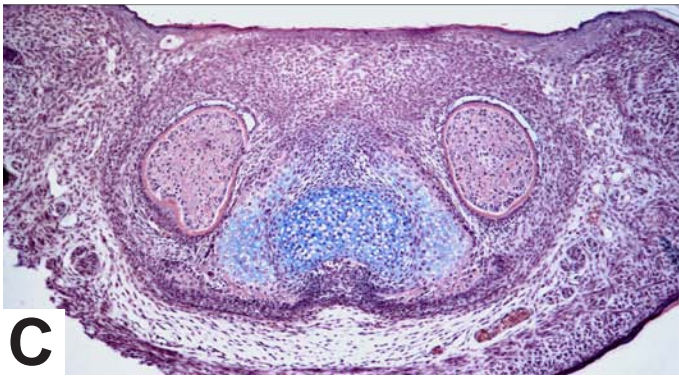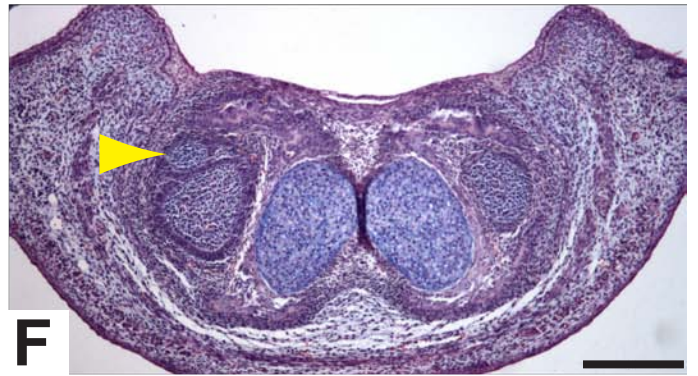

Supplement: supp_138.18.4063_DEV069195FigS6.pdf [file supp_138.18.4063_DEV069195FigS6.pdf]

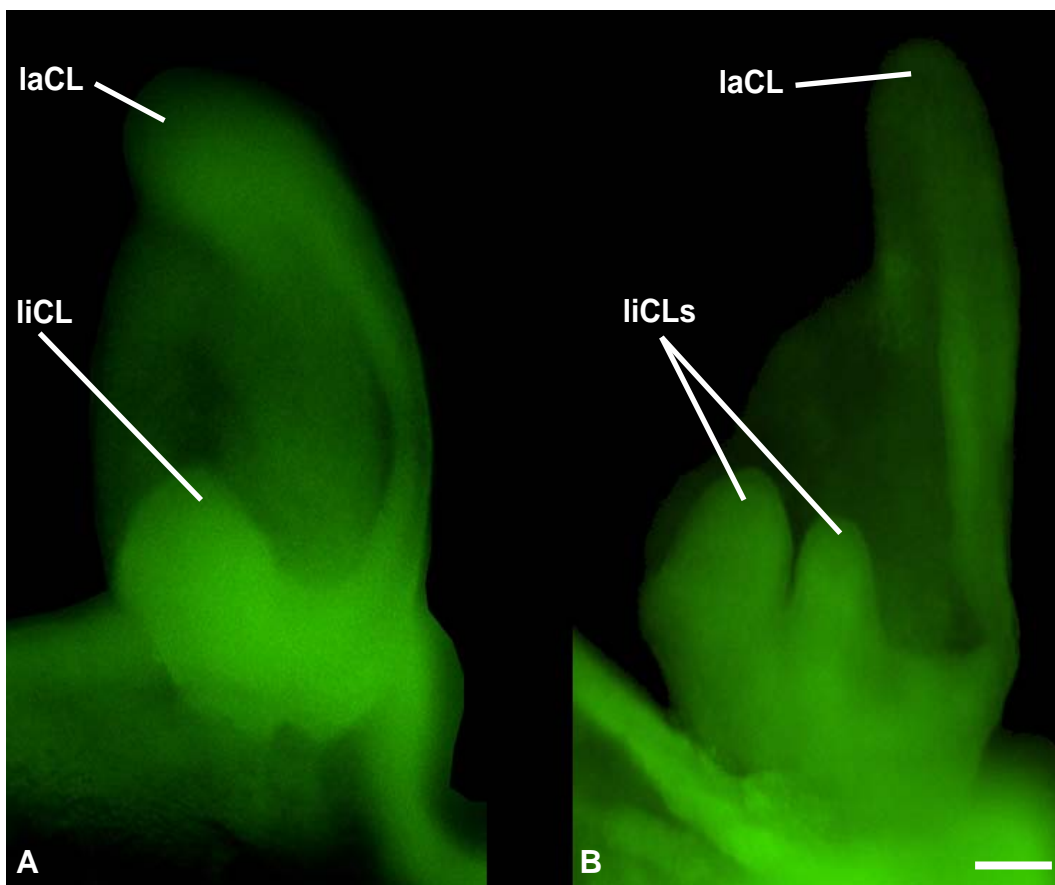

Supplement: supp_138.18.4063_DEV069195FigS7.pdf [file supp_138.18.4063_DEV069195FigS7.pdf]
